# Supplementary material
Source: PubMed Central journal article supplement (PMC7901017)
Supplement: sb0c00445_si_001.pdf [file sb0c00445_si_001.pdf]

## Supporting Information

### Prime Editing Guide RNA Design Automation Using PINE-CONE

Kylie Standage-Beier<sup>1,2</sup>, Stefan Tekel<sup>3</sup>, David A. Brafman<sup>1\*</sup>, Xiao Wang<sup>1\*</sup>

<sup>1</sup> School of Biological and Health Systems Engineering, <sup>2</sup> Molecular and Cellular Biology graduate program, <sup>3</sup> School for Engineering of Matter, Transport and Energy, Arizona State University, Tempe, AZ 85287, USA.

\* Corresponding author: DAB ([david.brafman@asu.edu](mailto:david.brafman@asu.edu)), XW ([xiaowang@asu.edu](mailto:xiaowang@asu.edu))

|                               |                                                     |
|-------------------------------|-----------------------------------------------------|
| <b>Supplementary Figure 1</b> | PINE-CONE User Interface and Input Format           |
| <b>Supplementary Figure 2</b> | PINE-CONE oligonucleotide output for cloning        |
| <b>Supplementary Figure 3</b> | PINE-CONE design of PCR primers flanking edit site  |
| <b>Supplementary Figure 4</b> | pegRNA designs by PINE-CONE match validated designs |
| <b>Supplementary Figure 5</b> | PINE-CONE design of pegRNAs in yeast S288C          |
| <b>Supplementary Table 1</b>  | PINE-CONE organism selection                        |
| <b>Supplementary Table 2</b>  | PINE-CONE cloning oligo format                      |

a

**PINE CONE: Creator Of New Edits**

**pegRNA Design:** PBS RTT Edit Cas9-HP  
5' 3' 3' 5'  
3' 5' Guide PAM

**1: Select Organism**  
Manual (.txt)  
Text File (.txt)  
ATCGA  
GCTAC  
AGCAT  
ATCTT

**2: Select Design**  
Nearest Protospacers to Edit  
PE2 PE3 PE3B

**3: Select Input Files**  
Select Edit File (.csv)  
Edit File: Example Input.csv  
Select DNA Sequence (.txt)  
DNA Sequence: DNA\_seq\_file.txt

**4: Output File**  
Output Name: Example output  
Example output.csv is complete  
Once file(s) are selected click 'Run PINE CONE'

**Run PINE CONE:** click when steps 1-4 are complete

**Analyze:** Appears for Human (hg38) and Yeast (S288C). Maps pegRNA designs

**Organism Selection:** select reference genome or plasmid/text file displays selection

**Select protospacer design:** define near or specific\* guide designs, \*requires reference genome sequence

**Select Prime editing strategy:** displays schematic of selection

**Input (.csv):** File defines edit location(s) and basic pegRNA parameters (RTT, PBS length)

**DNA sequence (.txt):** Appears for text file and plasmid selections

**Enter user defined output name**

**Output status:** Indicates when file write is complete

b

| pegRNA Name:        | Chromosome:           | Position:                                    | Edit:                     | RTT Length:                                                          | PBS Length:            | Notes:                                              |
|---------------------|-----------------------|----------------------------------------------|---------------------------|----------------------------------------------------------------------|------------------------|-----------------------------------------------------|
| Names are arbitrary | Edit locus chromosome | Absolute nucleotide coordinate of edit locus | Sequence of intended edit | longer RTT's increase editing range and are necessary for insertions | Primer sequence length | Section is copied over to output for record keeping |
| Name                | Chromosome            | Position (Bp)                                | Edit (A,T,C,G)            | RT (Bp)                                                              | PBS (Bp)               | Notes:                                              |
| HEK3-A              | 9                     | 107422356                                    | A                         | 13                                                                   | 13                     | Example SNP-pegRNA                                  |
| HEK3-Del            | 9                     | 107422356                                    | D5                        | 14                                                                   | 13                     | Example Del-pegRNA                                  |
| HEK3-Ins            | 9                     | 107422356                                    | iATGGAC                   | 22                                                                   | 13                     | Example Ins-pegRNA                                  |
| HEK3-A              | 9                     | 107422356                                    | A                         |                                                                      |                        | Example Automatic RT, PBS                           |

**Automatic RT:** Will scan for a viable RTT if left blank

**Automatic PBS:** Will estimate PBS by GC content if blank

**Supplemental Figure 1: PINE-CONE User Interface (UI) and Input (.CSV) format. (a)** PINE-CONE's UI includes of 4 primary steps. (1) Selection of organism determines if sequence is retrieved from a reference genome or is accessed locally via "Manual (.txt)" or "Plasmid (.txt)" selections. (2) Selection of protospacer preference and editing strategy determines the design format of pegRNAs and 'accessory' sgRNAs. (3) Input file selection or select locally an accompanying DNA sequence text file (.txt). (4) User defined arbitrary name of output file. This file is written in the same path as PINE-CONE. Following input of information, click "Run PINE-CONE". This will initiate API requests and design of pegRNAs. A green status is displayed once the output file is done writing. If pegRNAs are designed for Human (hg38) or Yeast (S288C) an 'analyze' will appear mapping the location of pegRNAs to their respective reference genomes. **(b)** Input file format (.CSV) includes an arbitrary pegRNA name, chromosome, position, edit sequence, RTT length and PBS length preference and user notes. The figure includes an example single base edit, deletion and insertion. If RT and/or PBS are left blank, PINE-CONE will estimate an optimal design.

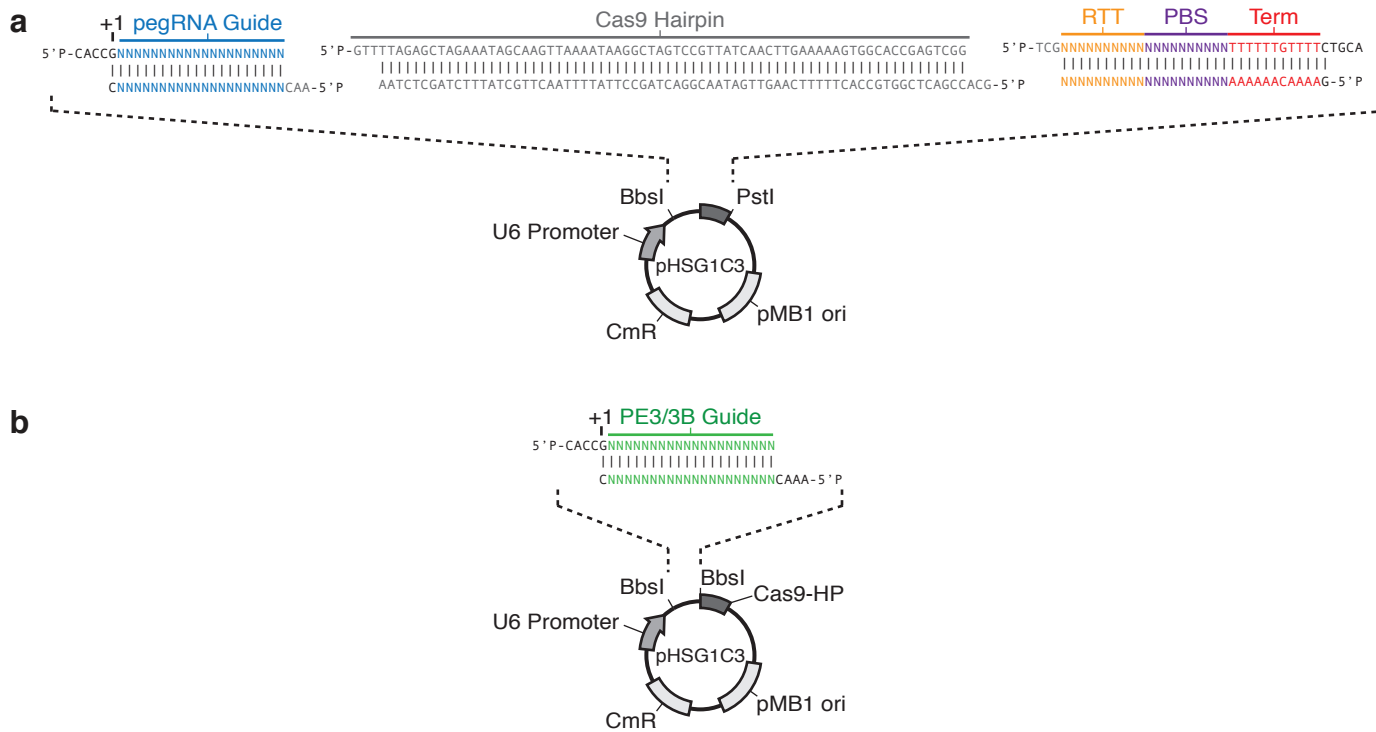

**Supplemental Figure 2: PINE-CONE oligonucleotide output for cloning of pegRNA and PE3/PE3B sgRNAs.** (a) Cloning strategy for pegRNAs using pHSG1C3. pHSG1C3 (Addgene # 164423) enables cloning of pegRNAs via digestion with BbsI and PstI. 5' phosphorylated (5'P) Oligonucleotide duplexes encoding a guide (blue, +1 is the transcriptional start of the U6 promoter), Cas9 hairpin (gray) and RTT/PBS and U6 terminator (Orange, Purple Blue respectively) are ligated into BbsI and PstI digested pHSG1C3. (b) PE3 or PE3b guides (green) are cloned into BbsI digested pHSG1C3. Oligonucleotide formatting can also be found in Supplemental table 2.

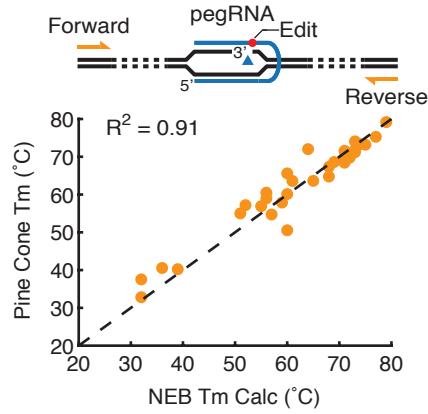

**Supplemental Figure 3: PINE-CONE design of PCR primers flanking the edit site.** PINE-CONE designed primers tm correlate with a commercially available New England Bio Labs (NEB) Tm calculator (<https://tmcalculator.neb.com/>).

**pegRNA-HEK3, Chr9, Position: 107422356, Edit: T-to-A**

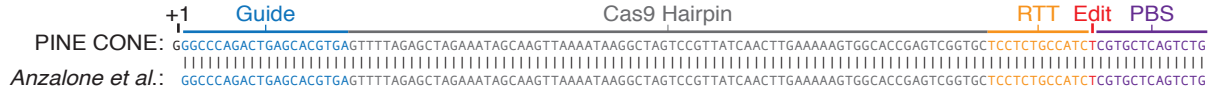

**pegRNA-RNF2, Chr1, Position: 185087640, Edit: G-to-T**

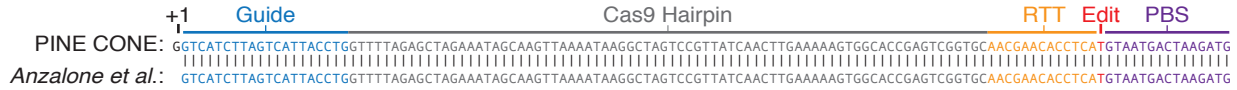

**pegRNA-FANCF, Chr11, Position: 22625787, Edit: C-to-A**

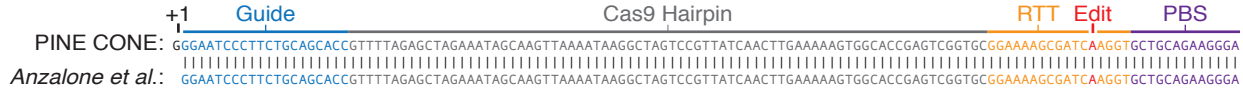

**pegRNA-VEGFA, Chr6, Position: 43769426, Edit: T-to-A**

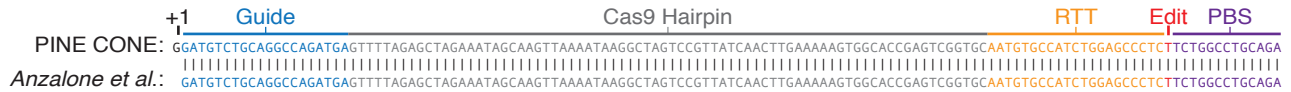

**pegRNA-EMX1, Chr2, Position: 72933874, Edit: G-to-T**

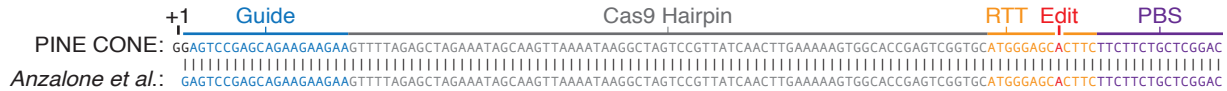

**pegRNA-CTNNB1(D6), Chr3, Position: 4122608, Edit: D6**

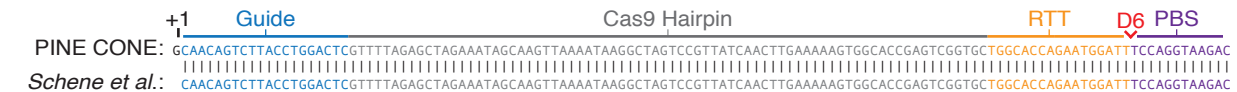

**pegRNA-CTNNB1(D3), Chr3, Position: 4122608, Edit: D3**

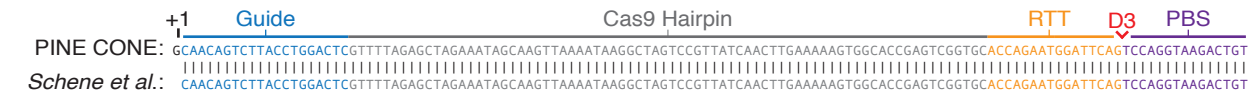

**pegRNA-ES1, Chr22, Position: 37623379, Edit: TC-to-GA**

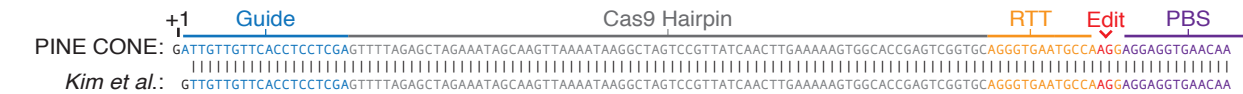

**pegRNA-ES2 Chr2, Position: 32039449, Edit: G-to-C**

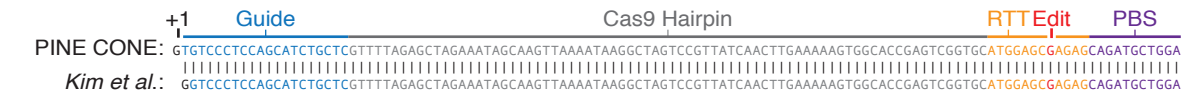

**pegRNA-ES3, Chr19, Position: 44865305, Edit: G-to-C**

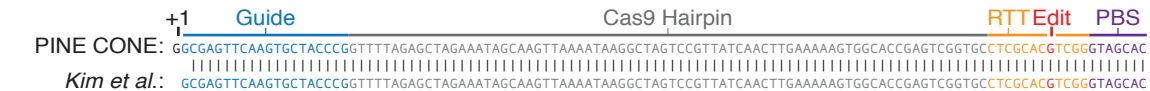

**pegRNA-ES4, Chr22, Position: 46308575, Edit: C-to-G**

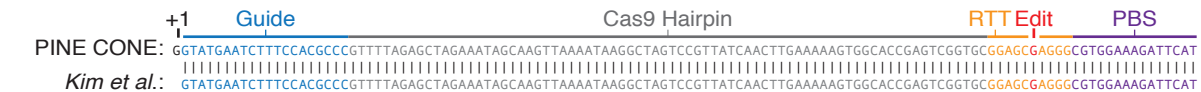

**Supplemental Figure 4: pegRNAs designs by PINE-CONE match previously validated pegRNAs.** A series of loci previously targeted and validated by *Anzalone et al.*, *Schene et al.* and *Kim et al.* (References 18,19,20) were provided as input to PINE-CONE. Alignments of in silico designed pegRNAs and designs with PINE-CONE designs (top) and published bottom. +1 is the 'G' transcriptional start from the U6 promoter added by PINE-CONE.

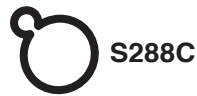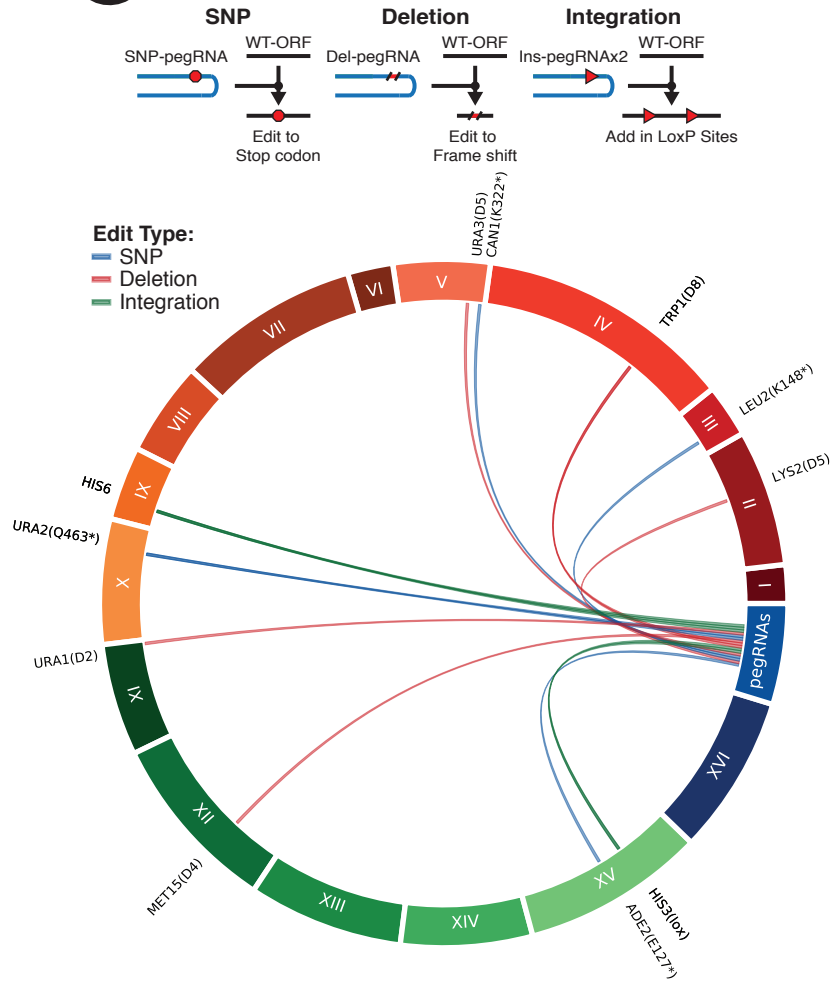

**Supplemental Figure 5: PINE-CONE design of pegRNAs targeting various marker loci in yeast (S288C).** (a) Strategies for targeting open reading frames (ORFs) on the yeast genome. Knock-out of various ORFs via point mutation introduction of stop codons, introduction of short deletions resulting in frame shift mutations and Insertion of LoxP sites flanking the ORF. (b) PINE-CONE Mapping of pegRNA targeting various marker loci with point mutations (blue chords), targeted deletion (Red chords), or integration of LoxP sites (green chords).

**Supplemental Table 1: PINE-CONE organism selection**

| Organism: | Species:              | Ref. Genome:    | Host Link:                                                                          |
|-----------|-----------------------|-----------------|-------------------------------------------------------------------------------------|
| Human     | <i>H.sapiens</i>      | hg38            | <a href="https://genome.ucsc.edu/index.html">https://genome.ucsc.edu/index.html</a> |
| Yeast     | <i>S.cerevisiae</i>   | SacCer3,(S288C) | <a href="https://genome.ucsc.edu/index.html">https://genome.ucsc.edu/index.html</a> |
| Mouse     | <i>M.musculus</i>     | mm10            | <a href="https://genome.ucsc.edu/index.html">https://genome.ucsc.edu/index.html</a> |
| Zebrafish | <i>D.erio</i>         | danRer11        | <a href="https://genome.ucsc.edu/index.html">https://genome.ucsc.edu/index.html</a> |
| Roundworm | <i>C.elegans</i>      | ce11            | <a href="https://genome.ucsc.edu/index.html">https://genome.ucsc.edu/index.html</a> |
| Fruitfly  | <i>D.melanogaster</i> | dm6             | <a href="https://genome.ucsc.edu/index.html">https://genome.ucsc.edu/index.html</a> |

PINE-CONE is capable of retrieving reference genome sequences for multiple species

**Supplemental Table 2: PINE-CONE Cloning Oligo Format**

| Oligo:                     | Sequence: (5'→3')                                                                 | Notes:                                                  |
|----------------------------|-----------------------------------------------------------------------------------|---------------------------------------------------------|
| pegRNA Guide Top           | CACCGNNNNNNNNNNNNNNNNNNNN                                                         | 'N' Sequence varies between pegRNAs                     |
| pegRNA Guide Bottom        | AACNNNNNNNNNNNNNNNNNNNNNC                                                         | 'N' Sequence varies between pegRNAs                     |
| pegRNA Cas9 Hairpin Top    | GTTTTAGAGCTAGAAATAGCAAGTTAAA<br>ATAAGGCTAGTCCGTTATCAACTTGAAA<br>AAGTGGCACCGAGTCGG | Constant for all pegRNA outputs                         |
| pegRNA Cas9 Hairpin Bottom | GCACCGACTCGGTGCCACTTTTTCAAGT<br>TGATAACGGACTAGCCTTATTTAACTT<br>GCTATTTCTAGCTCTAA  | Constant for all pegRNA outputs                         |
| pegRNA RTT-PBS Top         | TCGNNNNNNNNNNNNNNNNNNNTTTTT<br>TGTTTTCTGCA                                        | Sequence and length of 'N' varies for different pegRNAs |
| pegRNA RTT-PBS Bottom      | GAAAACAAAAANNNNNNNNNNNNNNN<br>NNNN                                                | Sequence and length of 'N' varies for different pegRNAs |
| PE3/3B sgRNA guide Top     | CACCGNNNNNNNNNNNNNNNNNNNN                                                         | 'N' Sequence varies between PE3 and PE3B sgRNAs         |
| PE3/3B sgRNA guide Bottom  | AACNNNNNNNNNNNNNNNNNNNNNC                                                         | N' Sequence varies between PE3 and PE3B sgRNAs          |

General format of oligonucleotides for cloning pegRNAs and PE3 or PE3B sgRNA guides into pHSG1C3. N = A, T, C or G. Cas9 hairpin oligos are constant across pegRNA designs and thus are not included directly in the PINE-CONE output to avoid redundancy.
